# Supplementary material for: Nrf2 Transcriptional Activity Governs Intestine Development
Source: MDPI journal article supplement (doi:10.3390/ijms23116175), 2022-05-31

**Supplementary file to:**

**Nrf2 transcriptional activity governs intestine development**

Aleksandra Kopacz, Damian Kloska, Dominika Klimczyk, Magdalena Kopec, Alicja Jozkowicz, Aleksandra Piechota-Polanczyk\*

Jagiellonian University, Faculty of Biochemistry, Biophysics and Biotechnology, Department of Medical Biotechnology, Krakow, Poland

\*Corresponding author

Department of Medical Biotechnology, Faculty of Biochemistry, Biophysics and Biotechnology, Jagiellonian University, Gronostajowa 7, 30-387 Krakow, Poland.

Email: [aleksnadra.piechota-polanczyk@uj.edu.pl](mailto:aleksnadra.piechota-polanczyk@uj.edu.pl)

## Supplementary figures

Figure S1. Embryos genotyping for *Rbm31* gene. Numbers (consecutive embryos); M1 (mass marker 100-1000 kb); F- female; M- male.

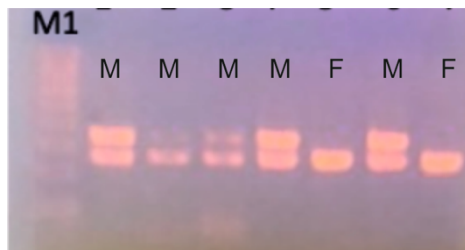

Figure S2. The negative controls for A) immunohistochemical and immunofluorescence stainings of B) 4-day-old pups and C) embryos. Representative images, magnification 400x, scale bar 30  $\mu$ m for A and C. magnification 250x, scale bar 40  $\mu$ m for B.

### A Negative controls

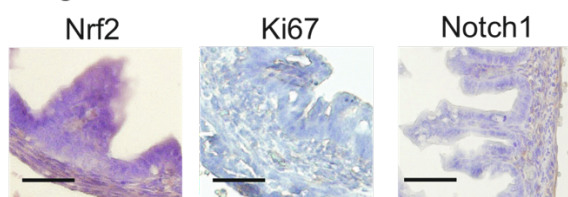

### B

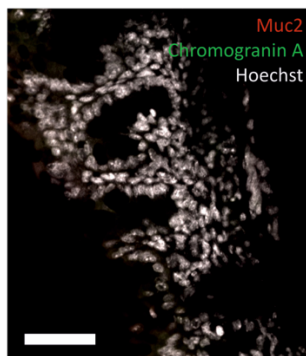

### C

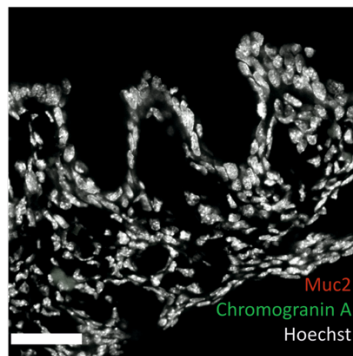

Figure S3. The workflow for the quantitative analysis of protein expression of IHC images.

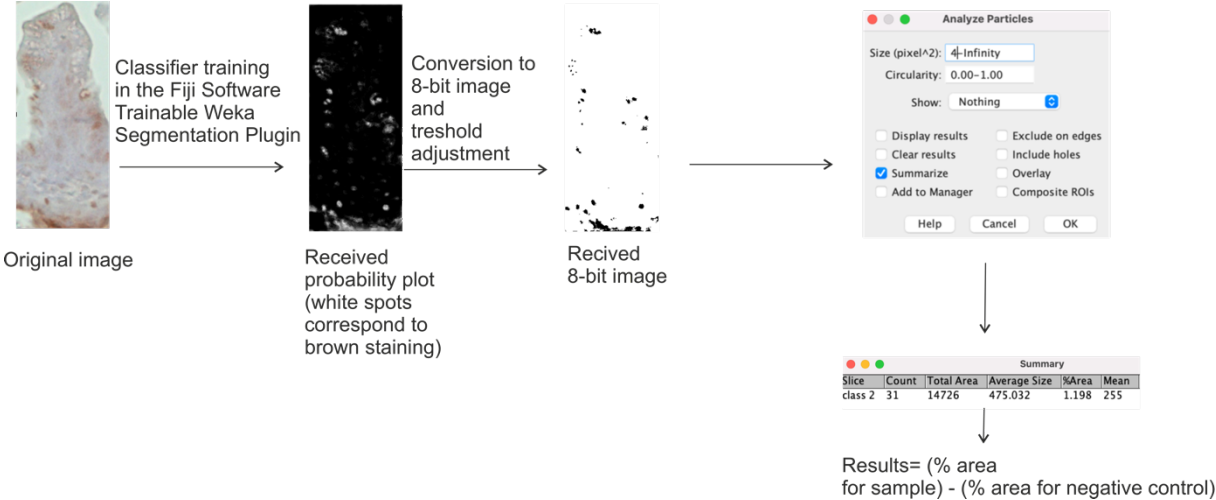

Supplement: s1 [file s1]
